# Supplementary material for: Inadequacies in the representation of sub-seasonal phytoplankton dynamics in Earth system models
Source: Copernicus journal article supplement (doi:10.5194/egusphere-2024-2294), 2024-08-16
Supplement: Supplementary file 1 [file egusphere-2024-2294-supplement.pdf]

# Inadequacies in the representation of sub-seasonal phytoplankton dynamics in Earth system models

Madhavan Girijakumari Keerthi<sup>1,2</sup>, Olivier Aumont<sup>1</sup>, Lester Kwiatkowski<sup>1</sup>, Marina Levy<sup>1</sup>

<sup>1</sup>LOCEAN-IPSL, Sorbonne Université, CNRS, IRD, MNHN, Paris, France

5 <sup>2</sup>LMD-IPSL, École Normale Supérieure, Université PSL, CNRS, École Polytechnique, Paris, France

*Correspondence to:* Madhavan Girijakumari Keerthi (keerthi.madhavan-girijakumari@locean.ipsl.fr)

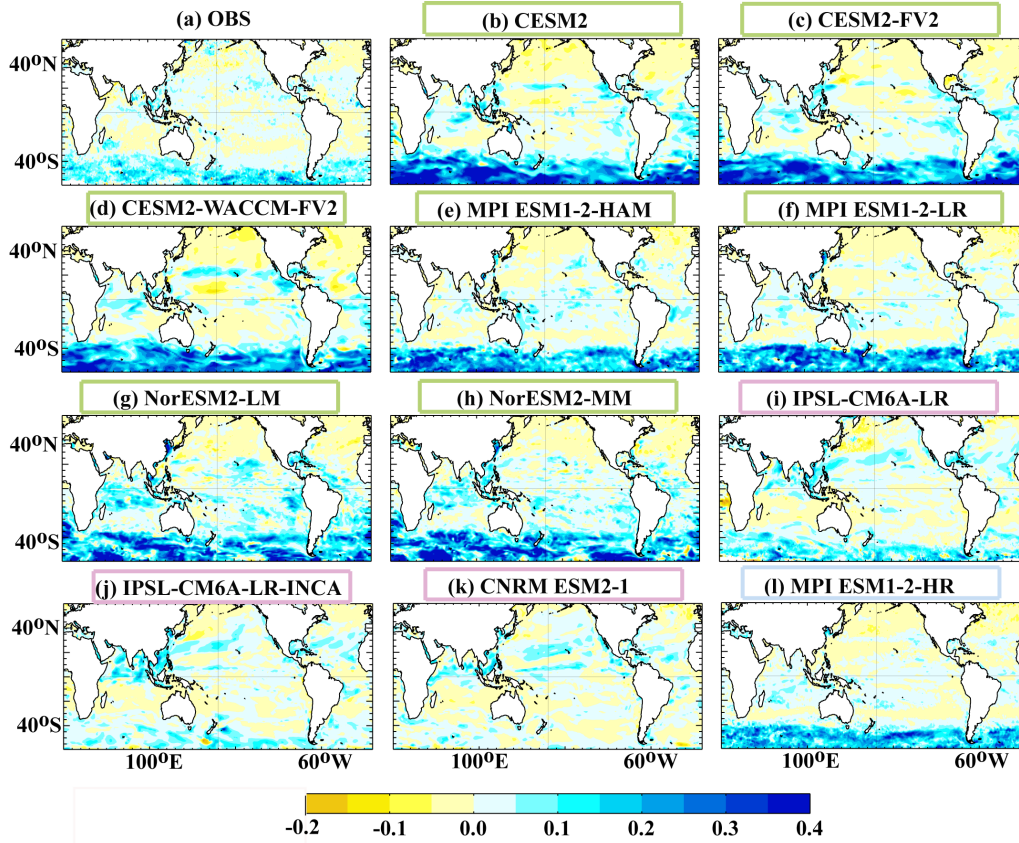

10

**Supplementary Figure 1:** Regression of annual mean SChl values on annual mean sub-seasonal values. Coloured boxes for the model names represent the different model groups described in Section 3.2, with green for Group 1, pink for Group 2, and blue for Group 3.

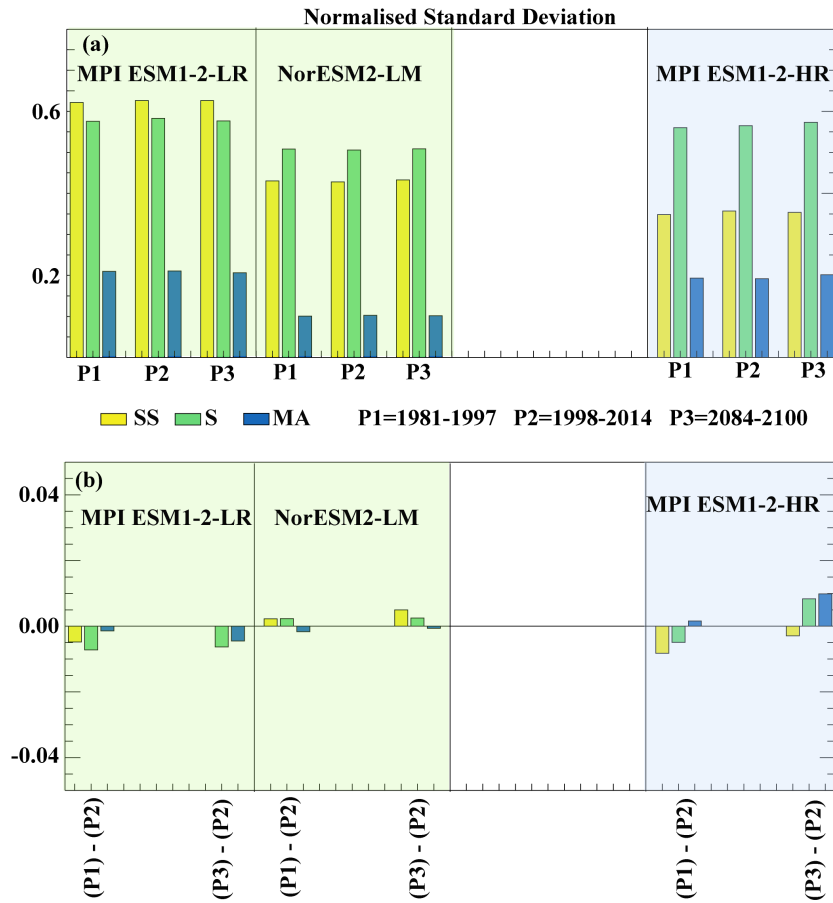

15

**Supplementary Figure 2:** (a) Normalised standard deviation of SChI from three different periods of piControl simulations (1981-1997, 1998-2014 & 2084-2100). (b) Difference between different periods considered. Shading in panel a and b represents the different model groups described in Section 3.2, with green for Group 1, and blue for Group 3.

20
